# Supplementary material
Source: PubMed Central journal article supplement (PMC3679255)
Supplement: NIHMS428858-supplement-Supp_Table_S1-S3.pdf [file NIHMS428858-supplement-Supp_Table_S1-S3.pdf]

Supplemental Table 1 - Summary demographic data of the subjects included

|            | AGE (years) | GENDER | PMI (hours) | TF (months) |
|------------|-------------|--------|-------------|-------------|
| MDD        | 73.75±8.93  | 9M/7F  | 21.03±5.91  | 22.17±15.41 |
| Comparison | 70.89±9.66  | 6M/3F  | 21.06±2.40  | 24.70±10.05 |

M=Males; F=Females; PMI=Postmortem interval; TF=Time in formalin.

Age, PMI and TF expressed as mean±standard deviation

Supplemental Table 2 - Average packing density and area fraction (af) of wWF-IR profiles in gray (GM) and white (WM) matter

|            | GM density (segments/mm <sup>2</sup> ) | GM af (%)             | WM density (segments/mm <sup>2</sup> ) | WM af (%)             |
|------------|----------------------------------------|-----------------------|----------------------------------------|-----------------------|
| MDD        | 330.08±49.72                           | 4.94±1.44             | 197.45±54.44                           | 3.11±1.36             |
| Comparison | 352.70±61.89                           | 4.46±1.23             | 194.19±53.73                           | 2.81±1.09             |
| ANCOVA     | F(1, 20)=0.283 p=0.6                   | F(1,20)=0.131 p=0.721 | F(1,20)=0.892 p=0.356                  | F(1,20)=0.575 p=0.457 |

Supplemental Table 3 - Average area and diameter of wWF-IR profiles in gray (GM) and white (WM) matter

|            | vessel area GM (µm <sup>2</sup> ) | vessel diam GM (µm)    | vessel area WM (µm <sup>2</sup> ) | vessel diam WM (µm)   |
|------------|-----------------------------------|------------------------|-----------------------------------|-----------------------|
| MDD        | 150.29±39.66                      | 7.31±0.74              | 154.59±49.15                      | 7.57±1.05             |
| Comparison | 127.34±30.88                      | 6.87±0.54              | 144.09±40.86                      | 7.06±0.79             |
| ANCOVA     | F(1,20)=0.456 p=0.507             | F(1, 20)=0.147 p=0.705 | F(1,20)=0.043 p=0.837             | F(1,20)=0.106 p=0.748 |
